# Supplementary material for: Repurposing of MitoTam: Novel Anti-Cancer Drug Candidate Exhibits Potent Activity against Major Protozoan and Fungal Pathogens
Source: PubMed Central journal article supplement (PMC9380531; doi:10.1128/aac.00727-22), 2022-07-20

1 **Supplementary data:**

2 **Table S1: Table of screened pathogens summarizing their impact on global health.**

3

4 **Table S2: *C. albicans* proteomic analysis after 12 h of MitoTam exposure.**

5 Proteome comparison of *C. albicans* cultivated in the presence of 4.4  $\mu$ M MitoTam for 12 h and  
6 untreated culture. The table is organized in four sheets: All detected proteins, Downregulated in  
7 MitoTam, Upregulated in MitoTam and Raw data. The first three sheets are showing fold-abundance  
8 change only for clarity. Upregulated and downregulated proteins were filtered by >2-fold change.  
9 Proteins were identified and, where applicable, subcellular localization was annotated based on  
10 Uniprot [63].

11

12 **Table S3: *T. brucei* proteomic analysis after 14h of MitoTam exposure.**

13 Proteome comparison of *T. brucei* cultivated in the presence of 100 nM MitoTam for 14 h and  
14 untreated culture. Table is organized in four sheets: All detected proteins, Downregulated in MitoTam,  
15 Upregulated in MitoTam and Raw data. The first three sheets are simplified to demonstrate fold-  
16 abundance change only for clarity. Upregulated and downregulated proteins were filtered by >2-fold  
17 change. Where applicable, manual annotation and localization prediction was based on the *T. brucei*  
18 927 mitochondrial proteome [46].

19

20 **Table S4: Summary of culture conditions and conditions for viability assays for all organisms used in**  
21 **this study.**

22

23 **Figure S1: Dose-response curves for MitoTam, Tamoxifen and control compounds.**

24 Cells were incubated with increasing concentrations of MitoTam, tamoxifen or control compounds  
25 under cultivation conditions described in Table S4. Cell concentration, viability or absolute OD<sub>595</sub> values  
26 were plotted against a compound concentration, dose-response curves and mean IC50 values  
27 (summarized in Table 1) were generated in Prism (8.0) (GraphPad Software).

28

29 **Figure S2: *Leishmania* sensitivity towards MitoTam evaluated by the intramacrophage assay.**

30 Murine macrophage cell culture J774A.1 was infected with amastigotes of *L. major* (pink line) or *L.*  
31 *infantum* (brown line) and incubated with increasing concentration of MitoTam as indicated on the x-  
32 axis. Uninfected macrophages (green line) were included as a control.

33

34 **Figure S3: Survival analysis of BALB/c mice infected with *T. brucei*.**

35 Survival of infected mice was monitored daily for 8 days. As depicted (dashed lines) half of the infected  
36 mice were injected with MitoTam (+MitoTam) on days 2 and 4 post-infection (3 mg/kg body weight).  
37 Number of surviving mice from MitoTam treated group (red line) as well as from the untreated control  
38 group (-MitoTam) (blue line) are depicted.

39

40 **Figure S4: MitoTam alters the mitochondrial function of bloodstream *T. brucei*.**

41 Cells were incubated with 40 nM of MitoTam for 16 and 24 hours and their mitochondrial parameters  
42 were assayed as for 100 nM MitoTam.

43 **A)** The O<sub>2</sub> flux per cell using high-resolution respirometry after addition of glycerol-3-phosphate was  
44 determined in BSF *T. brucei* untreated control cells (-MT, blue) and BSF cells treated with 40 nM

45 MitoTam for 16 hours (+MT 16 h, red) and 24 hours (+MT 24 h, red) (box and whiskers plot,  $n = 3$ , \*\*p  
46  $< 0.01$ , \*\*\*p  $< 0.001$ ).

47 **B)** Relative ADP/ATP ratio analyzed using a bioluminescence assay kit in BSF *T. brucei* untreated control  
48 cells (-MT, blue) and BSF cells treated with 40 nM MitoTam for 16 hours (+MT 16 h, red) and 24 hours  
49 (+MT 24 h, red) (box and whiskers plot,  $n = 3$ ).

50 **C)** Cytosolic and mitochondrial ATP levels were assessed in transgenic BSF *T. brucei* cell lines expressing  
51 firefly luciferase. Results of untreated control cells (-MT, blue) were compared with results of cultures  
52 treated with 40 nM MitoTam for 16 hours (+MT 16 h, red) and 24 hours (+MT 24 h, red). Data were  
53 normalized to the respective values of the untreated control cells and expressed as a percentage  
54 (mean  $\pm$  s.d.,  $n = 4$ ).

55 **D)** Total cellular ATP levels in BSF *T. brucei* were determined using a bioluminescence assay kit. Data  
56 from cultures treated with MitoTam for 16 hours (+MT 16 h, red) and 24 hours (+MT 24 h, red) were  
57 normalized to the values of the untreated control cells (-MT, blue) and expressed in percentage (box  
58 and whiskers plot,  $n = 4$ ).

59 **E)** Flow cytometry of TMRE stained cells was used to determine  $\Delta\Psi_m$  of BSF *T. brucei*. Data from  
60 cultures treated with 40 nM MitoTam for 16 hours (16 h +MT, red) and 24 hours (+MT 24 h, red) were  
61 normalized to the values of the untreated control cells (-MT, blue) and expressed in percentage.  
62 Uncoupler FCCP was added as a control for  $\Delta\Psi_m$  depolarization (box and whiskers plot,  $n = 6$ , \*\*\*\*P  
63  $< 0.0001$ ).

64 **F)** *In situ*  $\Delta\Psi_m$  was measured in digitonin-permeabilized BSF *T. brucei* cells stained with Safranin O dye.  
65 Where indicated, the  $F_0F_1$ -ATP synthase substrate – ATP, the  $F_0F_1$ -ATP synthase inhibitor - oligomycin  
66 (Olgm) and the protonophore SF6847 were added. Representative traces from measurement of  
67 untreated control cells (-MT, blue) in comparison with cells treated with 40 nM MitoTam for 16 hours  
68 (+MT 16 h, orange) and 24 hours (+MT 24 h, red) are shown.

**Tab. S1**

| Pathogen                                                | Illnesses                                                                             | Estimated Annual Incidence/human infections reported                                       | Mortality rate | Treatment options                                                                                                                                                                                                                                                        | References   |
|---------------------------------------------------------|---------------------------------------------------------------------------------------|--------------------------------------------------------------------------------------------|----------------|--------------------------------------------------------------------------------------------------------------------------------------------------------------------------------------------------------------------------------------------------------------------------|--------------|
| <i>Trypanosoma brucei</i>                               | Human African trypanosomiasis (sleeping sickness)                                     | ≤1000                                                                                      | ~100%          | fexinidazole, pentamidine, nifurtimox–eflornithine combination therapy, suramin, melarsoprol                                                                                                                                                                             | [1]          |
| <i>Trypanosoma cruzi</i>                                | Chagas disease                                                                        | 30 000                                                                                     | 1-50%          | benznidazole, nifurtimox                                                                                                                                                                                                                                                 | [2][3][4]    |
| <i>Leishmania major</i> ,<br><i>Leishmania mexicana</i> | cutaneous leishmaniasis                                                               | 600 000 -1 000 000                                                                         | N/A            | for immunocompetent patients -no treatment or topical ointments / for immunocompromised patients - sodium stibogluconate, miltefosine, fluconazole                                                                                                                       | [5][6]       |
| <i>Plasmodium falciparum</i>                            | malaria                                                                               | 214 000 000                                                                                | 10-50%         | artemisinin-based combination therapy                                                                                                                                                                                                                                    | [7]          |
| <i>Candida albicans</i>                                 | superficial mucosal and dermal infections, disseminated systemic invasive candidiasis | 750 000 (invasive candidiasis)                                                             | 30 - 70%       | antibiotics (echinocandin, fluconazole, or amphotericin B)                                                                                                                                                                                                               | [8][9][10]   |
| <i>Cryptococcus neoformans</i>                          | cryptococcosis                                                                        | 223 000                                                                                    | 24-95%         | anti-fungal drugs (amphotericin B, fluconazole, itraconazole)                                                                                                                                                                                                            | [11][12]     |
| <i>Naegleria fowleri</i>                                | Primary amoebic meningoencephalitis                                                   | 431 cases reported until 2020                                                              | ≥ 90%          | combination of antibiotics (such as amphotericin B, fluconazole, miltefosine) and drugs for relieving intracranial pressure                                                                                                                                              | [13][14]     |
| <i>Acanthamoeba</i> spp.                                | Granulomatous amoebic encephalitis (GAE) Acanthamoeba keratitis (AK)                  | AK around 3,000 cases reported, GAE approximately 200 cases have been described until 2004 | ≥ 90% (GAE)    | antimicrobial drugs used alone or in combined therapy (amphotericin B, pentamidine, sulfadiazine, flucytosine, fluconazole or itraconazole, chlorhexidine gluconate, ketoconazole)/antimicrobial and anti-inflammatory medicines have to be combined with cystidal drugs | [15][16][17] |
| <i>Giardia intestinalis</i>                             | giardiasis                                                                            | 28 000 000                                                                                 | N/A            | Metronidazole, Tinidazole, Albendazole                                                                                                                                                                                                                                   | [18]         |
| <i>Trichomonas vaginalis</i>                            | trichomoniasis                                                                        | 156 000 000                                                                                | N/A            | Metronidazole, Tinidazole                                                                                                                                                                                                                                                | [19]         |

## References:

- [1] WHO, "Human African Trypanosomiasis." [Online]. Available: <https://www.who.int/health-topics/human-african-trypanosomiasis>.
- [2] PAHO, "Chagas in America," 2017. [Online]. Available: [https://www3.paho.org/hq/index.php?option=com\\_content&view=article&id=13566:chagas-in-americas&Itemid=40721&lang=en](https://www3.paho.org/hq/index.php?option=com_content&view=article&id=13566:chagas-in-americas&Itemid=40721&lang=en).
- [3] D.-A. Álvarez-Hernández, G.-A. Franyuti-Kelly, R. Díaz-López-Silva, A.-M. González-Chávez, D. González-Hermosillo-Cornejo, and R. Vázquez-López, "Chagas disease: Current perspectives on a forgotten disease," *Rev. Médica del Hosp. Gen. México*, vol. 81, no. 3, pp. 154–164, Jul. 2018.
- [4] Z. M. Cucunubá, O. Okuwoga, M. Basáñez, and P. Nouvellet, "Increased mortality attributed to Chagas disease : a systematic review and meta-analysis," *Parasit. Vectors*, 2016.
- [5] WHO, "Leishmaniasis." [Online]. Available: [https://www.who.int/health-topics/leishmaniasis#tab=tab\\_3](https://www.who.int/health-topics/leishmaniasis#tab=tab_3).
- [6] S. Burza, S. L. Croft, and M. Boelaert, "Leishmaniasis," *Lancet*, vol. 6736, pp. 1–20, 2018.
- [7] WHO, "Malaria," 2021. [Online]. Available: <https://www.who.int/news-room/fact-sheets/detail/malaria%0D%0A>.
- [8] F. Bongomin, S. Gago, R. O. Oladele, and D. W. Denning, "Global and multi-national prevalence of fungal diseases—estimate precision," *Journal of Fungi*, vol. 3, no. 4. 2017.
- [9] F. Lamoth, S. R. Lockhart, E. L. Berkow, and T. Calandra, "Changes in the epidemiological landscape of invasive candidiasis," *J. Antimicrob. Chemother.*, vol. 73, pp. i4–i13, 2018.
- [10] P. G. Pappas *et al.*, "Executive Summary: Clinical Practice Guideline for the Management of Candidiasis: 2016 Update by the Infectious Diseases Society of America," *Clinical Infectious Diseases*, vol. 62, no. 4. pp. 409–417, 2015.
- [11] E. K. Maziarz and J. R. Perfect, "Cryptococcosis," *Infectious Disease Clinics of North America*, vol. 30, no. 1. pp. 179–206, 2016.
- [12] WHO, "WHO | Cryptococcal disease: what's new and important," *WHO*, 2018.
- [13] E. Grace, S. Asbill, and K. Virga, "Naegleria fowleri: Pathogenesis, diagnosis, and treatment options," *Antimicrobial Agents and Chemotherapy*, vol. 59, no. 11. pp. 6677–6681, 2015.
- [14] S. K. Maciver, J. E. Piñero, and J. Lorenzo-Morales, "Is Naegleria fowleri an Emerging Parasite?," *Trends in Parasitology*, vol. 36, no. 1. Elsevier Ltd, pp. 19–28, 01-Jan-2020.

- [15] K. Kot, N. A. Łanocha-Arendarczyk, and D. I. Kosik-Bogacka, "Amoebas from the genus *Acanthamoeba* and their pathogenic properties," *Ann. Parasitol.*, vol. 64, no. 4, pp. 299–308, 2018.
- [16] G. S. Visvesvara, H. Moura, and F. L. Schuster, "Pathogenic and opportunistic free-living amoebae: *Acanthamoeba* spp., *Balamuthia mandrillaris*, *Naegleria fowleri*, and *Sappinia diploidea*," *FEMS Immunology and Medical Microbiology*, vol. 50, no. 1. pp. 1–26, 2007.
- [17] F. L. Schuster and G. S. Visvesvara, "Free-living amoebae as opportunistic and non-opportunistic pathogens of humans and animals," *International Journal for Parasitology*, vol. 34, no. 9. Pergamon, pp. 1001–1027, 01-Aug-2004.
- [18] U. Ryan, N. Hijjawi, Y. Feng, and L. Xiao, "Giardia: an under-reported foodborne parasite," *Int. J. Parasitol.*, vol. 49, no. 1, pp. 1–11, 2019.
- [19] O. T. Van Gerwen and C. A. Muzny, "Recent advances in the understanding and management of of *Trichomonas vaginalis* infection," *F1000Research*, vol. 8, pp. 1–10, 2019.

Fig. S1

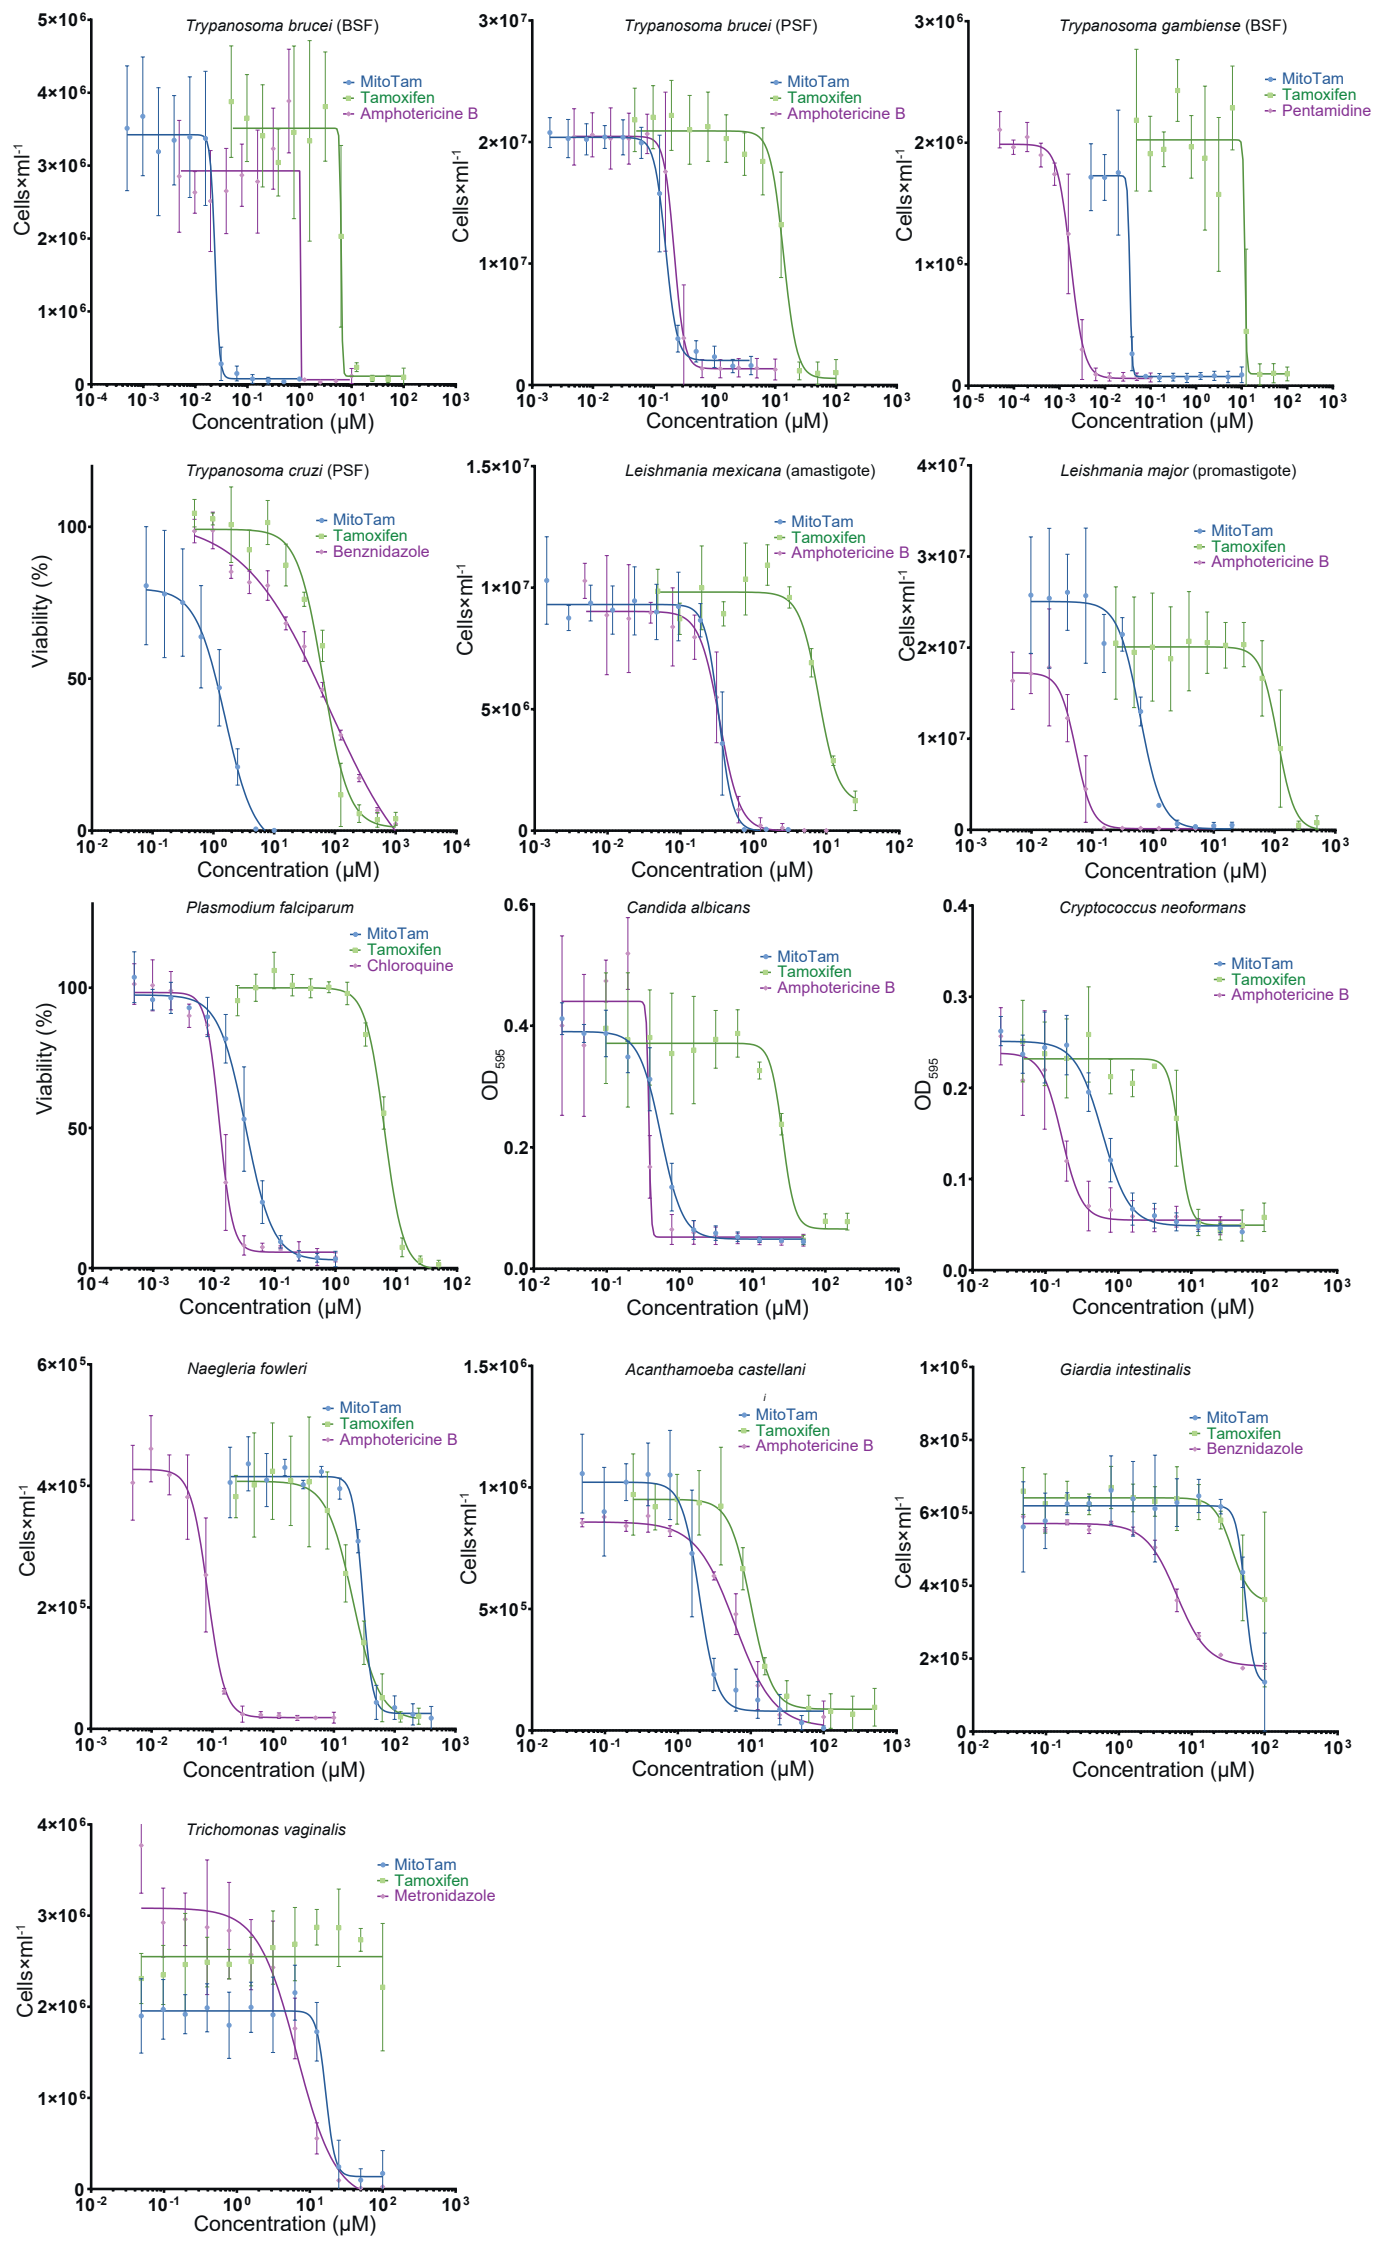

Fig. S2

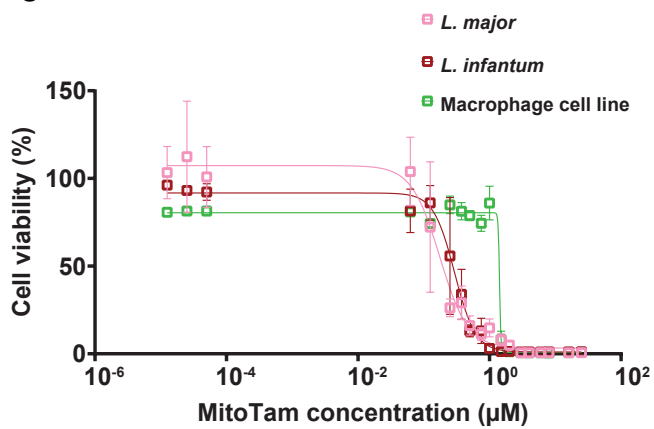



Fig. S3

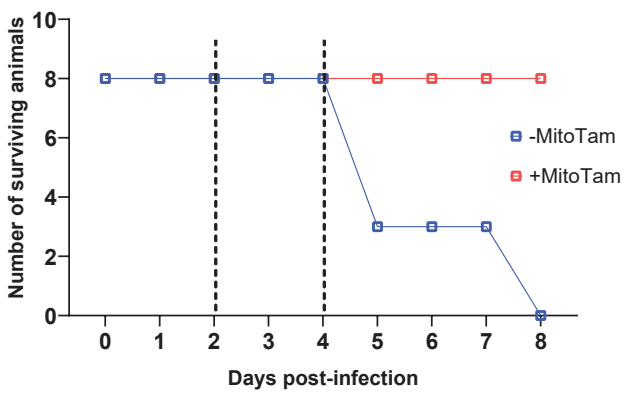

Fig. S4

A

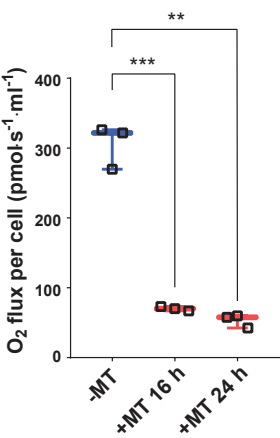

B

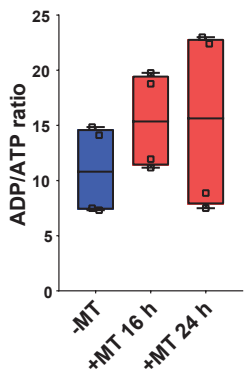

C

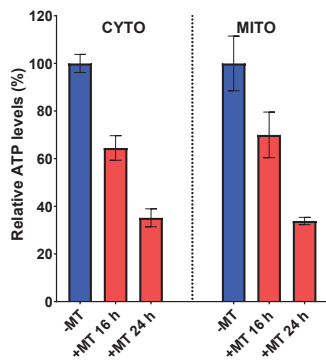

D

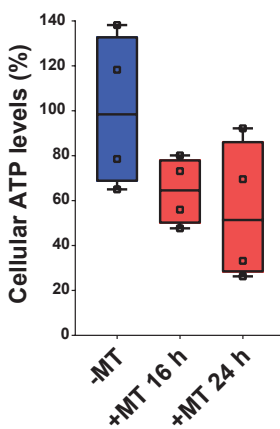

E

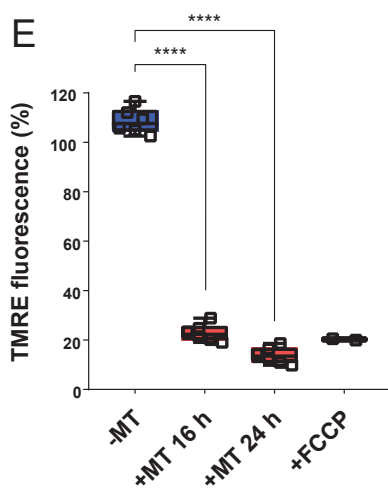

F

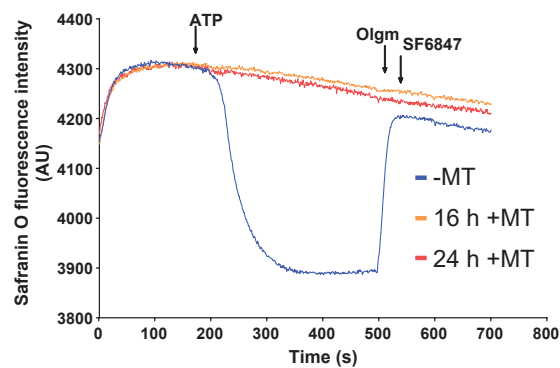

Supplement: aac.00727-22-s0001.pdf [file aac.00727-22-s0001.pdf]
